# Supplementary material for: Composition and genomic organization of arthropod Hox clusters
Source: EvoDevo. 2016 May 10;7:11. doi: 10.1186/s13227-016-0048-4 (PMC4862073; doi:10.1186/s13227-016-0048-4)
Supplement: Supplementary file 10 — 10.1186/s13227-016-0048-4 Measurements of the size of Hox gene coding and non-coding regions. [file 13227_2016_48_MOESM10_ESM.xlsx]

## Sheet: table S3
Supplemental Table S3 - Measurements of the size of coding and non-coding regions of Hox genes in Anopheles, Drosophila, Bombyx, Tribolium, Nasonia, Apis, Strigamia, Daphnia, Ixodes, and Tetranychus
Gene	Species	5' UTR (kb)	3' UTR (kb)	Coding sequence (kb)	Intron size (kb)	# Exons	# Introns
lab	Tetranychus	-	-	1.46	10.433	4	3
lab	Metaseiulus	-	-	1.284	30.9	3	2
lab	Ixodes	-	-	0.412	5.304	2	1
lab	Mesobuthus - Hox1	-	-	0.424	5.036	2	1
lab	Mesobuthus - Hox2	-	-	0.901	6.813	2	1
lab	Strigamia	0.013	-	1.011	1.415	3	2
lab	Daphnia	-	-	1.779	4.936	2	1
lab	Apis	0.63	0.449	1.304	14.899	2	1
lab	Nasonia	1.629	0.776	1.728	16.825	5	4
lab	Tribolium	0.028	0.145	1.062	11.548	2	1
lab	Bombyx	0.004	0.709	0.392	0	1	0
lab	Drosophila	0.244	0.641	1.89	14.388	3	2
lab	Anopheles	0	0	1.878	38.683	4	3
pb	Tetranychus	0.147	-	1.548	0.049	2	1
pb	Metaseiulus	-	-	1.802	37.253	4	3
pb	Ixodes		1.205	2.769	0.254	2	1
pb	Mesobuthus - Hox1	-	-	2.053	31.394	2	1
pb	Mesobuthus - Hox2	-	-	2.047	13.847	2	1
pb	Strigamia	0.309	1.418	8.974	7.437	2	1
pb	Daphnia	-	-	2.664	5.046	2	1
pb	Apis	0.744	0.861	1.003	45.897	3	2
pb	Nasonia	0	0.693	2.743	17.477	4	3
pb	Tribolium	0.112	0.377	1.965	18.52	3	2
pb	Bombyx	0.004	0.112	1.718	51.846	4	3
pb	Drosophila	0.971	0.408	2.349	30.535	8	8
pb	Anopheles	0	0	1.777	32.455	6	5
Hox3	Tetranychus	-	-	-	-	-	-
Hox3	Metaseiulus	-	-	-	-	-	-
Hox3	Ixodes	-	-	1.34	0.416	3	2
Hox3	Mesobuthus - Hox1	-	-	1.541	9.166	4	3
Hox3	Mesobuthus - Hox2	-	-	0.856	3.936	2	1
Hox3	Strigamia	-	-	-	-	-	-
Hox3	Daphnia	-	-	2.229	1.53	3	2
zen	Apis	0.101	0.178	0.657	3.146	3	2
zen	Nasonia	5.36	0.175	1.569	1.264	4	3
zen2	Tribolium	0.073	0.055	0.881	0.092	2	1
zen	Tribolium	0.027	0.066	0.738	0.106	2	1
zen	Bombyx	0.036	0.066	1.647	0.616	3	2
zen2	Drosophila	0.062	0.114	0.759	0.067	2	1
zen	Drosophila	0.159	0.046	1.062	0.064	2	1
bcd	Drosophila	0.195	0.834	1.485	1.111	4	3
zen	Anopheles	-	-	1.295	0	1	0
Dfd	Tetranychus	0.02	0.267	1.368	0.331	2	1
Dfd	Metaseiulus	0.324	1.11	1.076	15.134	7	6
Dfd	Ixodes	-	-	0.421	0.077	2	1
Dfd	Mesobuthus - Hox1	-	-	0.409	0	1	0
Dfd	Mesobuthus - Hox2	-	-	0.799	0.114	2	1
Dfd	Strigamia	-	-	1.05	0.7	2	1
Dfd	Daphnia	-	-	1.41	0.205	2	1
Dfd	Apis	1.482	2.451	5.028	5.028	2	1
Dfd	Nasonia	0	0	1.577	4.71	2	1
Dfd	Tribolium	0.422	0.247	1.239	7.696	2	1
Dfd	Bombyx	0.74	0.659	1.177	17.126	2	1
Dfd	Drosophila	0.489	0.489	1.761	7.853	5	4
Dfd	Anopheles	0	0	1.73	33.082	5	4
Scr	Tetranychus	0.379	1.505	1.05	13.845	2	2
Scr	Metaseiulus			0.82	24.932	5	4
Scr	Ixodes	-	-	0.272	0	1	0
Scr	Mesobuthus - Hox1			0.286	0	1	0
Scr	Mesobuthus - Hox2	-	-	1.054	6.471	5	4
Scr	Strigamia	-	-	-	-	-	-
Scr	Daphnia	-	-	1.323	5.555	6	5
Scr	Apis	1.113	2.617	1.088	29.677	3	2
Scr	Nasonia	0	1.001	1.171	19.644	2	1
Scr	Tribolium	0.263	0.875	0.939	20.337	2	2
Scr	Bombyx	0.419	1.648	1.069	92.198	3	2
Scr	Drosophila	1.061	2.262	1.254	22.875	2	2
Scr	Anopheles	0.261	0.02	1.064	41.215	3	2
ftz30	Tetranychus	0.031	0.125	1.101	0.566	2	1
ftz20	Tetranychus	0.18	0.48	1.194	3.118	2	1
ftz	Metaseiulus	0	3.845	0.989	20.887	4	3
ftz	Ixodes	-	-	0.332	0	1	0
ftz	Mesobuthus - Hox1	-	-	0.793	0.822	2	1
ftz	Mesobuthus - Hox2	-	-	0.628	0.233	2	1
ftz	Strigamia	1.076	0.371	0.727	0.306	2	1
ftz	Daphnia	-	-	1.287	0.841	2	1
ftz	Apis	0	0	1.796	1.64	2	1
ftz	Nasonia	0	0.537	1.345	0.158	2	1
ftz	Tribolium	0.022	0.139	0.873	0.05	2	1
ftz	Bombyx	0	0	0.753	0.679	3	2
ftz	Drosophila	0.07	0.471	1.233	0.147	2	1
ftz	Anopheles	0	0	1.034	0.093	2	1
Antp40	Tetranychus	-	-	0.523	0.895	5	4
Antp30	Tetranychus	1.136	0.333	1.128	28.742	3	6
Antp	Metaseiulus	-	-	0.787	10.469	5	4
Antp	Ixodes	-	-	0.289	3.91	2	1
Antp	Mesobuthus - Hox1	-	-	0.39	7.202	3	2
Antp	Mesobuthus - Hox2	-	-	0.895	12.041	2	1
Antp	Strigamia	0.299	6.514	1.201	8.092	3	2
Antp	Daphnia	-	-	1.974	1.479	2	1
Antp	Apis	0.113	0.911	1.055	14.918	2	1
Antp	Nasonia	0	0	1.088	11.129	2	1
Antp	Tribolium	0.826	1.374	0.972	7.165	2	1
Antp	Bombyx	0.642	1.567	0.091	215.665	3	2
Antp	Drosophila	2.841	2.035	1.086	98.336	3	5
Antp	Anopheles	0.677	0.725	1.014	88.696	5	4
Ubx	Tetranychus	0.066	0.02	0.399	0	1	0
Ubx	Metaseiulus	0.101	-	0.533	11.283	4	3
Ubx	Ixodes	-	-	0.412	3.528	2	1
Ubx	Mesobuthus - Hox1	-	-	0.429	4.02	3	2
Ubx	Mesobuthus - Hox2	-	-	0.769	12.202	2	1
Ubx	Strigamia	0.058	0.535	0.805	10.802	2	1
Ubx	Daphnia	-	-	1.143	13.722	2	1
Ubx	Apis	1.368	0.096	1.177	317.634	4	3
Ubx	Nasonia	0.759	0.01	1.036	97.312	2	1
Ubx	Tribolium	1.52	1.202	0.945	71.521	3	2
Ubx	Bombyx	0.453	3.907	0.763	139.997	3	2
Ubx	Drosophila	0.963	2.149	1.17	73.521	4	3
Ubx	Anopheles	0.108	0.271	0.89	48.406	2	1
abdA	Tetranychus	-	-	-	-	-	-
abdA	Metaseiulus	-	0.013	4.448	29.211	13	13
abdA	Ixodes	-	-	0.487	0.89	2	1
abdA	Mesobuthus - Hox1	-	-	0.466	0	1	0
abdA	Mesobuthus - Hox2	-	-	0.856	8.534	2	1
abdA	Strigamia	10.236	0.139	0.868	28.037	2	1
abdA	Daphnia	-	-	2.85	41.389	28	27
abdA	Apis	1.438	4.24	1.255	28.495	3	2
abdA	Nasonia	0.113	4.751	1.512	27.057	5	4
abdA	Tribolium	1.358	1.733	0.993	30.002	2	1
abdA	Bombyx	0.122	3.29	1.029	46.866	3	2
abdA	Drosophila	1.231	2.473	1.032	17.668	6	5
abdA	Anopheles	0.198	0.024	1.594	15.768	8	7
AbdB	Tetranychus	0.019	0.781	0.657	0.614	3	2
AbdB	Metaseiulus	0.155	0.088	0.927	14.599	6	5
AbdB	Ixodes	-	1.616	0.374	0.119	2	1
AbdB	Mesobuthus - Hox1	-	-	0.316	5.652	2	1
AbdB	Mesobuthus - Hox2	-	-	1.221	11.857	6	5
AbdB	Strigamia	0.613	0.392	0.901	1.81	2	1
AbdB	Daphnia	-	-	1.455	1.395	2	1
AbdB	Apis	0.285	0.39	1.331	5.122	2	1
AbdB	Nasonia	0	0.023	1.194	92.906	8	7
AbdB	Tribolium	1.078	0.091	1.056	6.754	2	3
AbdB	Bombyx	0.386	0.419	1.058	59.651	6	5
AbdB	Drosophila	8.132	2.129	0.813	41.324	4	6
AbdB	Anopheles	0.059	0	1.382	10.039	5	4
